# Supplementary material for: Influence of a CO2-switchable additive on the surface and foaming properties of a cationic non-switchable surfactant
Source: Royal Society of Chemistry journal article supplement (doi:10.1039/d3sm00273j), 2023-01-01
Supplement: d3sm00273j1.pdf [file d3sm00273j1.pdf]

## Supporting Information

### Influence of a CO<sub>2</sub>-switchable additive on the surface and foaming properties of a cationic non-switchable surfactant

Robin R. Benedix,<sup>a</sup> Sophia Botsch,<sup>a,b</sup> Natalie Preisig,<sup>a</sup> Volodymyr  
Kovalchuk,<sup>c</sup> Philip G. Jessop,<sup>b</sup> and Cosima Stubenrauch<sup>a</sup>

<sup>a</sup> Institute of Physical Chemistry, University of Stuttgart, Stuttgart, Germany.

<sup>b</sup> Department of Chemistry, Queen's University, Kingston, Ontario, Canada

<sup>c</sup> Institute of Biocolloid Chemistry of the National Academy of Sciences of Ukraine,  
Kiev, Ukraine

## Contents

|                                                                                                              |          |
|--------------------------------------------------------------------------------------------------------------|----------|
| <b>S1 Purification of C<sub>14</sub>TAB</b>                                                                  | <b>2</b> |
| <b>S2 Purity of TMBDA</b>                                                                                    | <b>3</b> |
| <b>S3 Protonation of TMBDA</b>                                                                               | <b>3</b> |
| <b>S4 Derivation of the Gibbs adsorption isotherm for systems containing C<sub>14</sub>TAB<br/>and TMBDA</b> | <b>5</b> |
| S4.1 Same-charge surfactant mixture . . . . .                                                                | 5        |
| S4.2 Ionic an non-ionic surfactant mixture . . . . .                                                         | 6        |
| <b>S5 Time evolution of the liquid fraction and of the foam bubble sizes</b>                                 | <b>6</b> |

## S1 Purification of C<sub>14</sub>TAB

Surface tension measurements of the purchased tetradecyltrimethylammonium bromide (C<sub>14</sub>TAB) (*Acros Organics*, purity 99 %) showed a distinct minimum around the CMC in the  $\sigma$ - $c$ -curve (Figure S1.1). This indicates the contamination of the surfactant with surface active impurities.<sup>1,2</sup> The surfactant was therefore recrystallized twice from an acetone/ethanol mixture. An amount of 20 g of the purchased C<sub>14</sub>TAB was mixed with 300 mL acetone and heated up to 65 °C. Afterwards, 15 mL ethanol was added drop wise to the dispersion until all of the C<sub>14</sub>TAB was dissolved. The solution was cooled to room temperature and stored in the fridge over night. The white crystalline solid was separated from the acetone/ethanol mixture and dried under high vacuum. After the second recrystallization 18 g of the purified C<sub>14</sub>TAB were obtained. In the  $\sigma$ - $c$ -curve of the purified C<sub>14</sub>TAB no minimum is visible, confirming the purity of the surfactant (Figure S1.1).

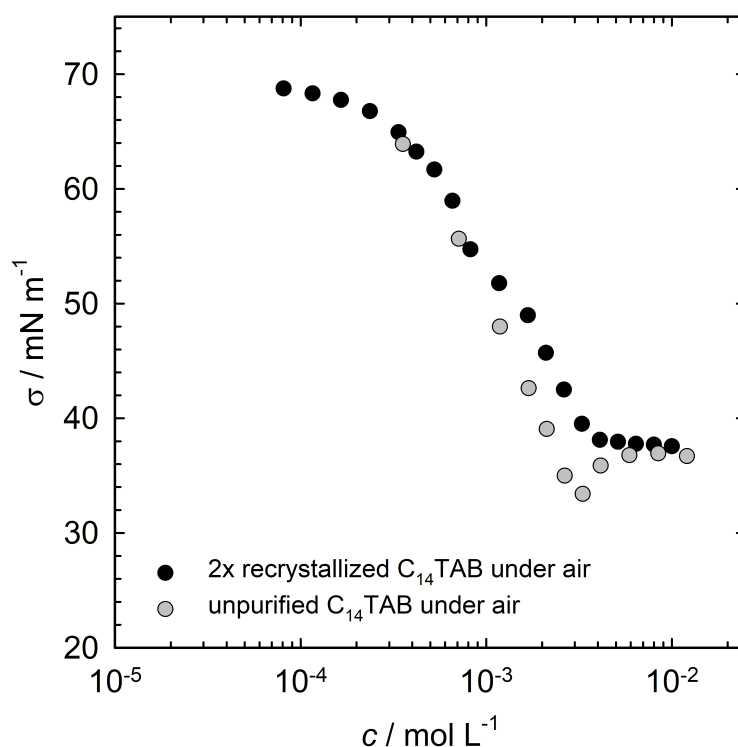

**Figure S1.1:** Surface tension as a function of the surfactant concentration of an aqueous solution of unpurified and 2x recrystallized C<sub>14</sub>TAB at  $23 \pm 1$  °C. Former one shows a distinct minimum, indicating the contamination with surface active impurities, which are not present in the purified surfactant.<sup>1,2</sup>

## S2 Purity of TMBDA

The CO<sub>2</sub>-switchable additive TMBDA (*N,N,N,N*-tetramethyl-1,4-butanediamine, 98 %) was bought from *abcr* and was used without further purification. The purity of TMBDA was confirmed by <sup>1</sup>H NMR spectroscopy (Figure S2.1).

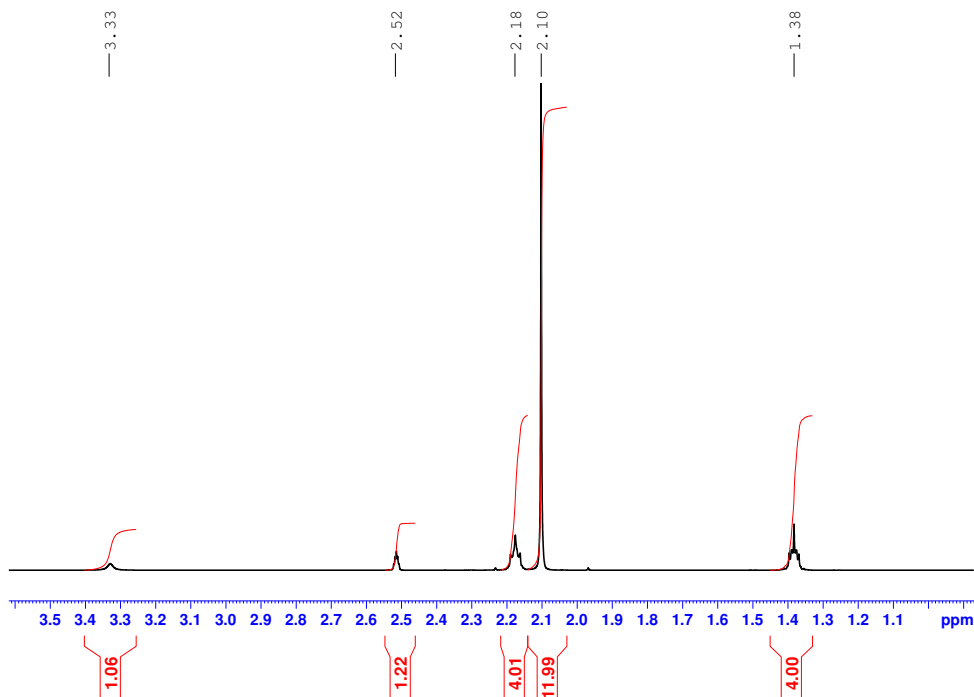

**Figure S2.1:** <sup>1</sup>H NMR spectrum of the additive TMBDA (*N,N,N,N*-tetramethyl-1,4-butanediamine), <sup>1</sup>H NMR (500 MHz, DMSO-d<sub>6</sub>): 1.38 (dd, 4H, CH<sub>2</sub>), 2.1 (s, 12H, NCH<sub>3</sub>), 2.18 (t, 4H, CH<sub>2</sub>N).

## S3 Protonation of TMBDA

Taking a look at the protonation of TMBDA in aqueous solutions, one has to distinguish between three coexisting species, i.e. the neutral and the mono- and diprotonated TMBDA.<sup>3,4</sup> The simplified reaction scheme looks as follows

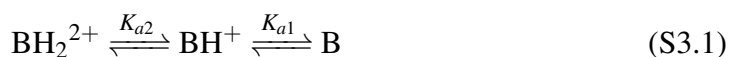

with

$$K_{a1} = \frac{[\text{B}]_{\text{aq}}[\text{H}_3\text{O}^+]_{\text{aq}}}{[\text{BH}^+]_{\text{aq}}}, \quad (\text{S3.2})$$

$$K_{a2} = \frac{[\text{BH}^+]_{\text{aq}}[\text{H}_3\text{O}^+]_{\text{aq}}}{[\text{BH}_2^{2+}]_{\text{aq}}}, \quad (\text{S3.3})$$

and

$$[\text{B}]_0 = [\text{B}]_{\text{aq}} + [\text{BH}^+]_{\text{aq}} + [\text{BH}_2^{2+}]_{\text{aq}}, \quad (\text{S3.4})$$

where  $K_{a1} = 5.012 \cdot 10^{-11} \text{ mol L}^{-1}$  and  $K_{a2} = 1.698 \cdot 10^{-9} \text{ mol L}^{-1}$ .<sup>3,5</sup> With Equation S3.2 - Equation S3.4 one can derive three equations for the ratio of the neutral  $[\text{B}]_{\text{aq}}/[\text{B}]_0$ , the monoprotated  $[\text{BH}^+]_{\text{aq}}/[\text{B}]_0$ , and the diprotated TMBDA  $[\text{BH}_2^{2+}]_{\text{aq}}/[\text{B}]_0$  in the solution as a function of the pH (Figure S3.1), namely

$$\frac{[\text{B}]_{\text{aq}}}{[\text{B}]_0} = \frac{K_{a1}K_{a2}}{M} \quad (\text{S3.5})$$

$$\frac{[\text{BH}^+]_{\text{aq}}}{[\text{B}]_0} = \frac{K_{a2}[\text{H}_3\text{O}^+]_{\text{aq}}}{M} \quad (\text{S3.6})$$

$$\frac{[\text{BH}_2^{2+}]_{\text{aq}}}{[\text{B}]_0} = \frac{[\text{H}_3\text{O}^+]_{\text{aq}}^2}{M} \quad (\text{S3.7})$$

with

$$M = K_{a1}K_{a2} + K_{a2}[\text{H}_3\text{O}^+]_{\text{aq}} + [\text{H}_3\text{O}^+]_{\text{aq}}^2. \quad (\text{S3.8})$$

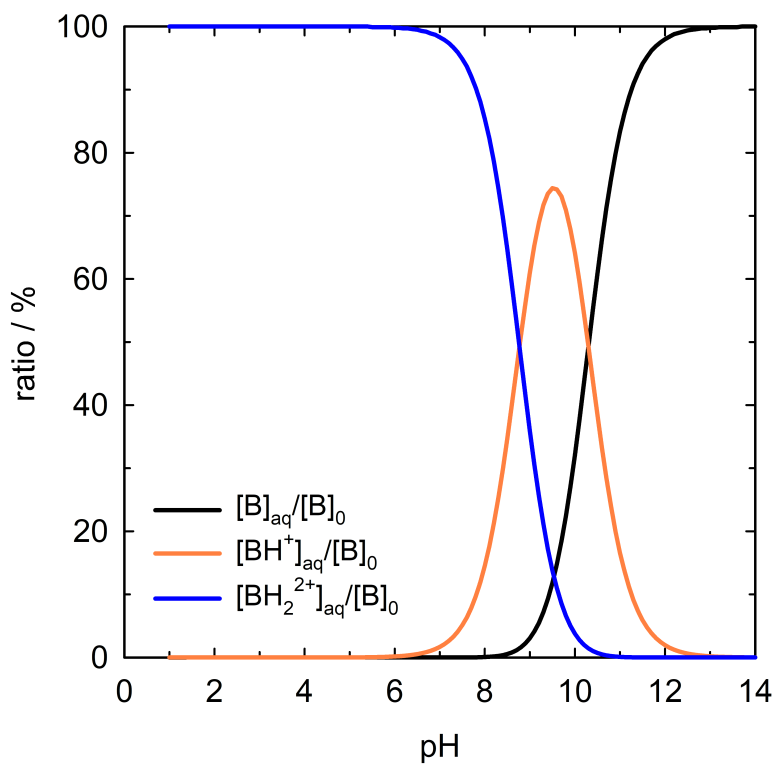

**Figure S3.1:** The calculated ratio of the neutral  $[\text{B}]_{\text{aq}}/[\text{B}]_0$ , the monoprotated  $[\text{BH}^+]_{\text{aq}}/[\text{B}]_0$ , and the diprotated TMBDA  $[\text{BH}_2^{2+}]_{\text{aq}}/[\text{B}]_0$  as a function of the pH.

## S4 Derivation of the Gibbs adsorption isotherm for systems containing C<sub>14</sub>TAB and TMBDA

The following derivations were kindly provided by Volodymyr Kovalchuk from the Institute of Biocolloid Chemistry of the National Academy of Sciences of Ukraine, Kiev, Ukraine.

### S4.1 Same-charge surfactant mixture

For a mixture of two same-charge surfactants, namely C<sub>14</sub>TAB and diprotonated TMBDA, the following adsorption isotherm and equation of state can be used<sup>6,7</sup>

$$b_1 \gamma_{\pm} (c_{R1} c_X)^{\frac{1}{2}} = \frac{(\theta_1 (\theta_1 + \theta_2))^{\frac{1}{2}}}{1 - (\theta_1 + \theta_2)} \exp(-2a_1 \theta_1 - 2a_{12} \theta_2) \quad (\text{S4.1})$$

$$b_2 \gamma_{\pm} (c_{R2} c_X)^{\frac{1}{2}} = \frac{(\theta_2 (\theta_1 + \theta_2))^{\frac{1}{2}}}{1 - (\theta_1 + \theta_2)} \exp(-2a_2 \theta_2 - 2a_{12} \theta_1) \quad (\text{S4.2})$$

$$\Pi = -RT\Gamma_{\infty} [\ln(1 - \theta_1 - \theta_2) + a_1 \theta_1^2 + a_2 \theta_2^2 + 2a_{12} \theta_1 \theta_2] \quad (\text{S4.3})$$

where  $c_{R1}$  and  $c_{R2}$  are the surfactants bulk concentrations,  $c_X$  is the counterions concentration ( $c_X = c_{R1} + c_{R2}$ ),  $b_1$  and  $b_2$  are the surfactants surface-to-bulk distribution coefficients,  $\theta_1$  and  $\theta_2$  are the partial surface coverages,  $\gamma_{\pm}$  is the activity coefficient for the ions in the bulk,  $a_i$  are the Frumkin interaction parameters, and  $\Gamma_{\infty}$  is the limiting adsorption.

Considering the most simple case, we will assume  $\gamma_{\pm} = 1$  (because the ions concentrations are below 0.01 mol dm<sup>-3</sup>) and neglect interactions between the surfactants ( $a_i = 0$ ). Then, from Equation S4.1 and Equation S4.2, we obtain

$$b_1^2 c_{R1} c_X + b_2^2 c_{R2} c_X = \frac{(\theta_1 + \theta_2)^2}{(1 - (\theta_1 + \theta_2))^2} \quad (\text{S4.4})$$

If the surfactants concentrations  $c_{R1}$  and  $c_{R2}$  change proportionally (preserving the same ratio  $r = c_{R2}/c_{R1}$  by dilution), then  $c_X = (1 + r)c_{R1}$  and Equation S4.4 turns to

$$b_{ef} c_{R1} = \frac{\theta}{1 - \theta} \quad (\text{S4.5})$$

where  $b_{ef} = (b_1^2(1 + r) + b_2^2 r(1 + r))^{\frac{1}{2}}$  is the effective adsorption constant and  $\theta = \theta_1 + \theta_2$  is the total surface coverage. With Equation S4.3 and Equation S4.5 it is not difficult to check that

$$\frac{1}{2RT} \frac{d\Pi}{d \ln c_{R1}} = \Gamma_{\infty} \theta \quad (\text{S4.6})$$

For high concentrations  $\theta \rightarrow 1$  and

$$\frac{1}{2RT} \frac{d\Pi}{d \ln c_{R1}} \rightarrow \Gamma_{\infty} \quad (\text{S4.7})$$

## S4.2 Ionic an non-ionic surfactant mixture

For ionic and non-ionic surfactant mixture, namely C<sub>14</sub>TAB and neutral TMBDA, the set of equations can be used<sup>8</sup>

$$b_1 c_1 = \frac{\theta_1}{1 - \theta_1 - \theta_2} \exp(-2a_1 \theta_1 - 2a_{12} \theta_2) \quad (\text{S4.8})$$

$$b_2 c_2 = \frac{\theta_2}{1 - \theta_1 - \theta_2} \exp(-2a_2 \theta_2 - 2a_{12} \theta_1) \quad (\text{S4.9})$$

$$\Pi = -\frac{RT}{\omega_0} [\ln(1 - \theta_1 - \theta_2) + a_1 \theta_1^2 + a_2 \theta_2^2 + 2a_{12} \theta_1 \theta_2] \quad (\text{S4.10})$$

where  $\omega_0$  is the partial molar surface area. Again, neglecting interactions between the surfactants ( $a_i = 0$ ) from Equation S4.8 and Equation S4.9, one obtains

$$b_1 c_1 + b_2 c_2 = \frac{\theta_1 + \theta_2}{1 - \theta_1 - \theta_2} \quad (\text{S4.11})$$

For the surfactants concentrations  $c_1$  and  $c_2$  changing proportionally ( $c_{R2} = r c_{R1}$ ) Equation S4.11 turns to

$$b_{ef} c_1 = \frac{\theta}{1 - \theta} \quad (\text{S4.12})$$

where  $b_{ef} = b_1 + b_2 r$  is the effective adsorption constant and  $\theta = \theta_1 + \theta_2$  is the total surface coverage. Proceeding similarly to the previous case, one can show that for high concentrations  $\theta \rightarrow 1$  and

$$\frac{1}{RT} \frac{d\Pi}{d \ln c_1} \rightarrow \frac{1}{\omega_0} \quad (\text{S4.13})$$

Note that in Equation S4.6-S3.13  $\Gamma_{\infty}$  is equal to  $(2\omega_0)^{-1}$ , where  $\omega_0$  is the molar surface area of ions.<sup>8</sup> This sets equivalence between the equations S3.7 and S3.13.

## S5 Time evolution of the liquid fraction and of the foam bubble sizes

In Figure S5.1 the time evolution of the liquid fraction  $\varepsilon$  of foams generated with aqueous 35 mM (10x CMC) C<sub>14</sub>TAB, C<sub>14</sub>TAB:TMBDA 1:1, and 1:5 solutions can be seen.

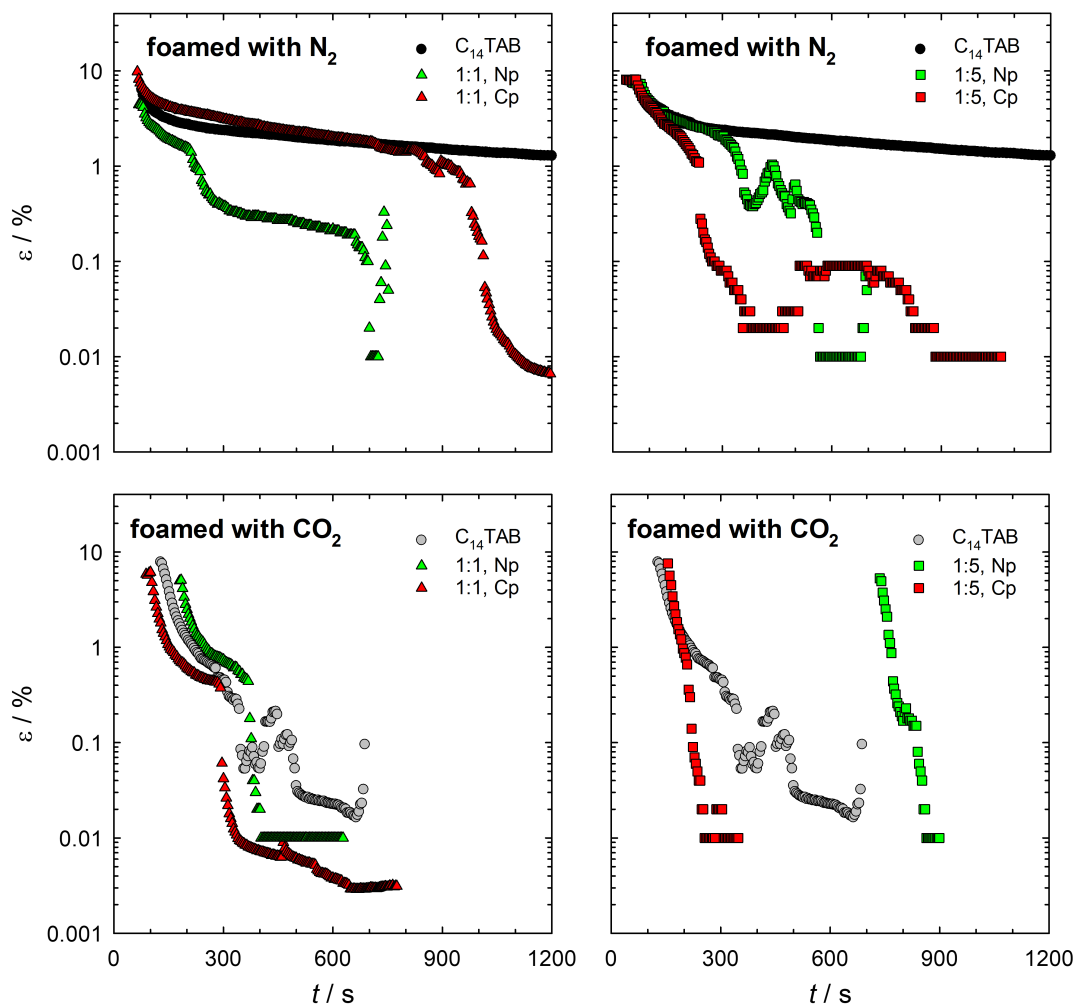

**Figure S5.1:** Time evolution of the liquid fraction  $\epsilon$  for foams stabilized with aqueous 35 mM (10x CMC)  $C_{14}TAB$ ,  $C_{14}TAB$ :TMBDA 1:1 and 1:5 solutions. The solutions were pre-sparged with either  $N_2$  (Np, green) or  $CO_2$  (Cp, red). (top) foamed with  $N_2$  ( $Q = 84 \text{ mL min}^{-1}$ ). (bottom) foamed with  $CO_2$  ( $Q = 84 \text{ mL min}^{-1}$ ).

In Table S5.1 the time evolution of the arithmetic mean radius  $\langle r \rangle$  and polydispersity index  $PI$  of the foam bubbles after generation of foams stabilized with aqueous 35 mM (10x CMC)  $C_{14}TAB$ ,  $C_{14}TAB$ :TMBDA 1:1, and 1:5 solutions can be seen. For foams generated with  $N_2$  images were taken at 0 s, 100 s, and 200 s after foam generation and for foams generated with  $CO_2$  images were taken at 0 s, 10 s, and 20 s after foam generation. The bubble images, used for the determination of the arithmetic mean radius  $\langle r \rangle$  and polydispersity index  $PI$ , as well as their distribution can be seen in Figure S5.2 - Figure S5.7.

**Table S5.1:** Time evolution of the arithmetic mean radius  $\langle r \rangle$  and polydispersity index  $PI$  of the foam bubbles after generation of foams stabilized with aqueous 35 mM (10x CMC)  $C_{14}TAB$ ,  $C_{14}TAB:TMBDA$  1:1, and 1:5 solutions. The solutions containing TMBDA were pre-sparged with either  $N_2$  (Np) or  $CO_2$  (Cp) before foaming with  $N_2$  or  $CO_2$

|                             |                          | $t / s$ |      |      |
|-----------------------------|--------------------------|---------|------|------|
| solution foamed with $N_2$  |                          | 0       | 100  | 200  |
| $C_{14}TAB$                 | $\langle r \rangle / mm$ | 0.34    | 0.34 | 0.33 |
|                             | $PI$                     | 0.16    | 0.17 | 0.22 |
| $C_{14}TAB:TMBDA$ 1:1, Np   | $\langle r \rangle / mm$ | 0.32    | 0.30 | 0.33 |
|                             | $PI$                     | 0.29    | 0.40 | 0.53 |
| $C_{14}TAB:TMBDA$ 1:1, Cp   | $\langle r \rangle / mm$ | 0.31    | 0.29 | 0.29 |
|                             | $PI$                     | 0.21    | 0.34 | 0.50 |
| $C_{14}TAB:TMBDA$ 1:5, Np   | $\langle r \rangle / mm$ | 0.30    | 0.30 | 0.29 |
|                             | $PI$                     | 0.25    | 0.33 | 0.49 |
| $C_{14}TAB:TMBDA$ 1:5, Cp   | $\langle r \rangle / mm$ | 0.33    | 0.32 | 0.38 |
|                             | $PI$                     | 0.17    | 0.34 | 0.57 |
| solution foamed with $CO_2$ |                          | 0       | 10   | 20   |
| $C_{14}TAB$                 | $\langle r \rangle / mm$ | 0.35    | 0.39 | 0.44 |
|                             | $PI$                     | 0.38    | 0.41 | 0.46 |
| $C_{14}TAB:TMBDA$ 1:1, Np   | $\langle r \rangle / mm$ | 0.67    | 0.74 | 0.66 |
|                             | $PI$                     | 0.32    | 0.25 | 0.49 |
| $C_{14}TAB:TMBDA$ 1:1, Cp   | $\langle r \rangle / mm$ | 0.41    | 0.54 | 0.75 |
|                             | $PI$                     | 0.50    | 0.56 | 0.29 |
| $C_{14}TAB:TMBDA$ 1:5, Np   | $\langle r \rangle / mm$ | 0.62    | 0.67 | -    |
|                             | $PI$                     | 0.54    | 0.62 | -    |
| $C_{14}TAB:TMBDA$ 1:5, Cp   | $\langle r \rangle / mm$ | 0.49    | 0.80 | -    |
|                             | $PI$                     | 0.52    | 0.42 | -    |

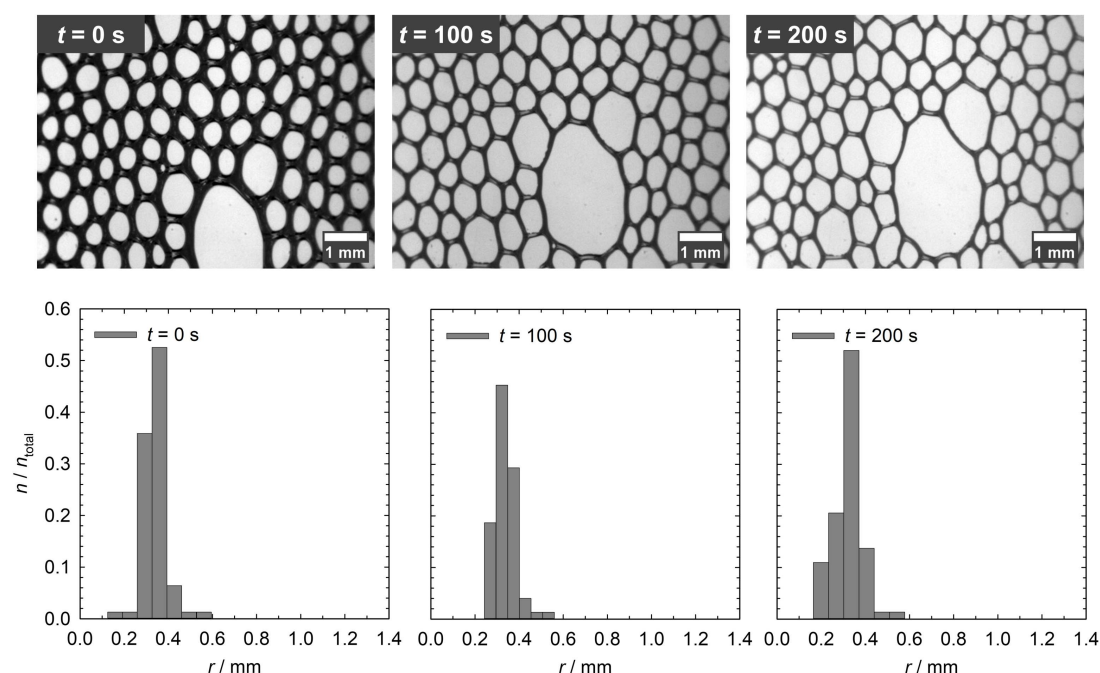

**Figure S5.2:** Cell size analysis pictures and bubble size distributions  $n/n_{total}$  plotted versus the bubble radius  $r$  for foams stabilized with an aqueous 35 mM (10x CMC)  $C_{14}TAB$  solution foamed with  $N_2$ . Photos were taken 0 s, 100 s, and 200 s after foam generation stopped.

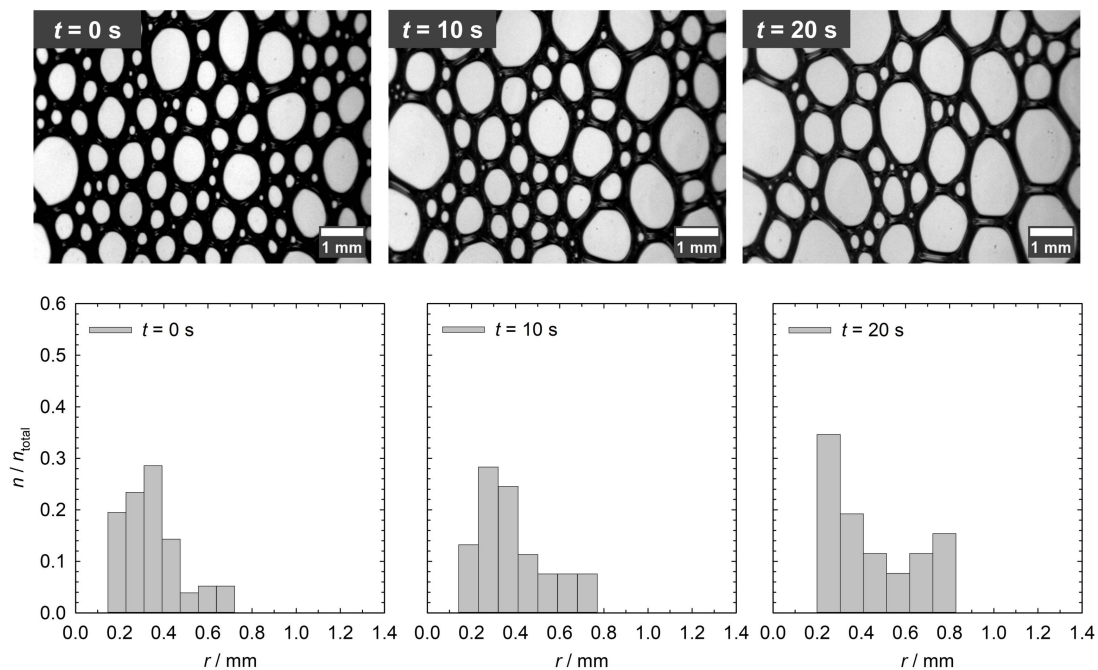

**Figure S5.3:** Cell size analysis pictures and bubble size distributions  $n/n_{\text{total}}$  plotted versus the bubble radius  $r$  for foams stabilized with an aqueous 35 mM (10x CMC)  $\text{C}_{14}\text{TAB}$  solution foamed with  $\text{CO}_2$ . Photos were taken 0 s, 10 s, and 20 s after foam generation stopped.

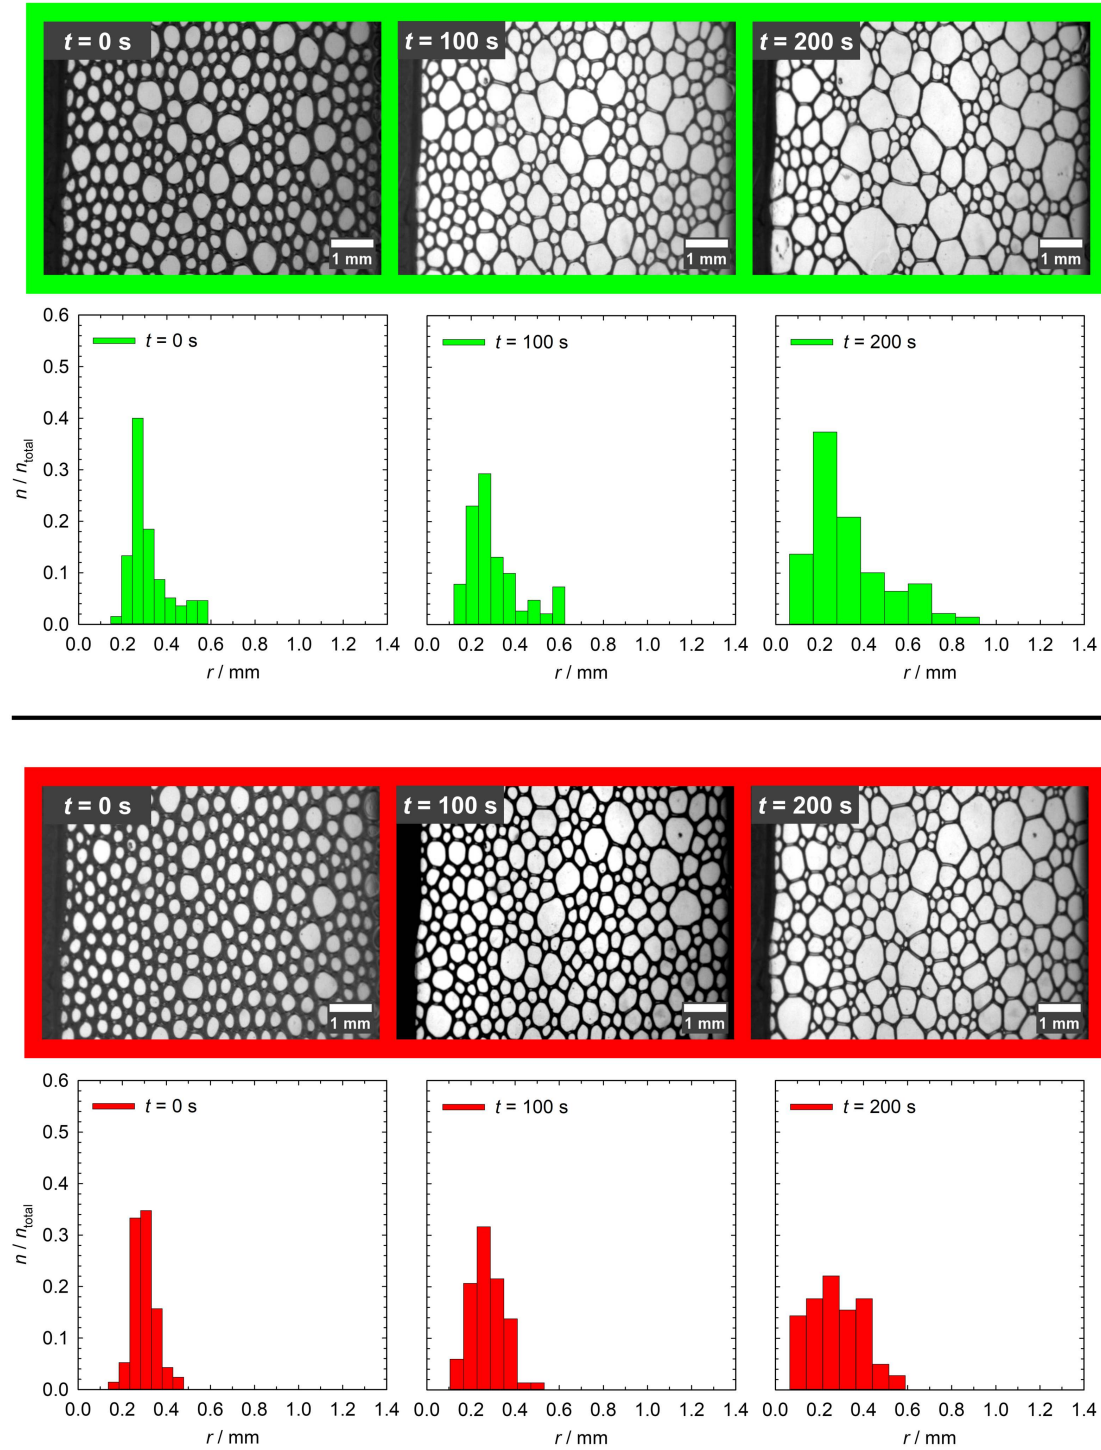

**Figure S5.4:** Cell size analysis pictures and bubble size distributions  $n/n_{total}$  plotted versus the bubble radius  $r$  for foams stabilized with aqueous 35 mM (10x CMC)  $C_{14}TAB:TMBDA$  1:1 solutions, i.e. the solutions contained 35 mM (10x CMC) surfactant and 35 mM TMBDA, foamed with  $N_2$ . Photos were taken 0 s, 100 s, and 200 s after foam generation stopped. (top) the surfactant solution was pre-sparged with  $N_2$  (Np, green). (bottom) the surfactant solution was pre-sparged with  $CO_2$  (Cp, red).

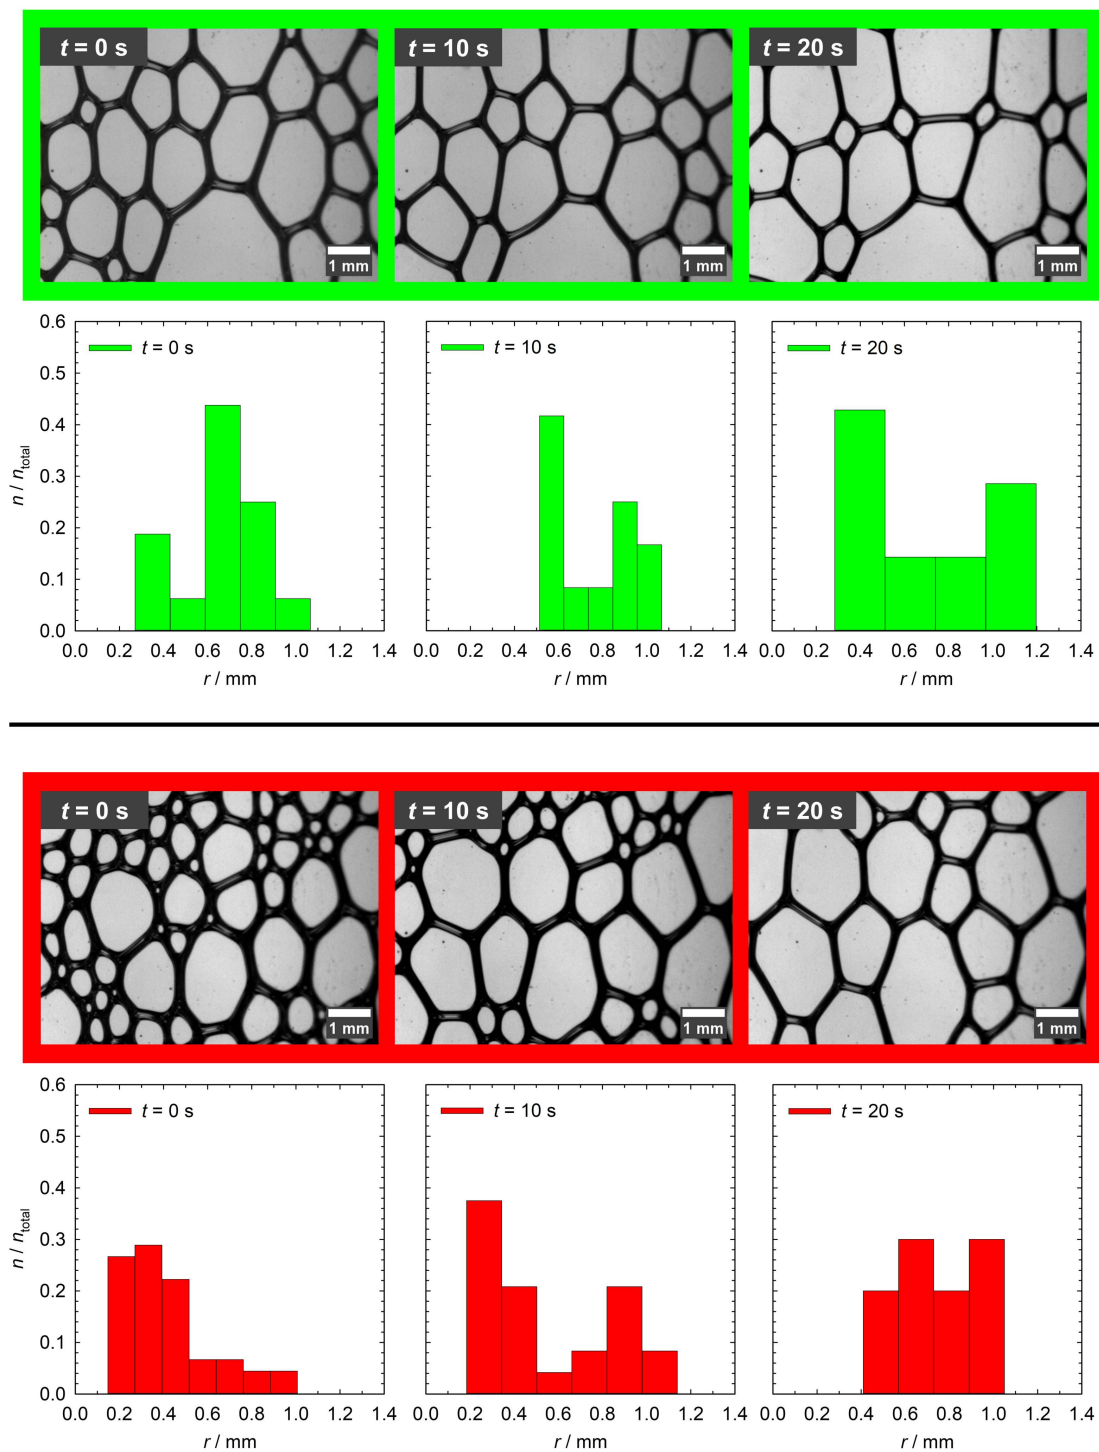

**Figure S5.5:** Cell size analysis pictures and bubble size distributions  $n/n_{\text{total}}$  plotted versus the bubble radius  $r$  for foams stabilized with aqueous 35 mM (10x CMC)  $\text{C}_{14}\text{TAB}:\text{TMBDA}$  1:1 solutions, i.e. the solutions contained 35 mM (10x CMC) surfactant and 35 mM TMBDA, foamed with  $\text{CO}_2$ . Photos were taken 0 s, 10 s, and 20 s after foam generation stopped. (top) the surfactant solution was pre-sparged with  $\text{N}_2$  (Np, green). (bottom) the surfactant solution was pre-sparged with  $\text{CO}_2$  (Cp, red).

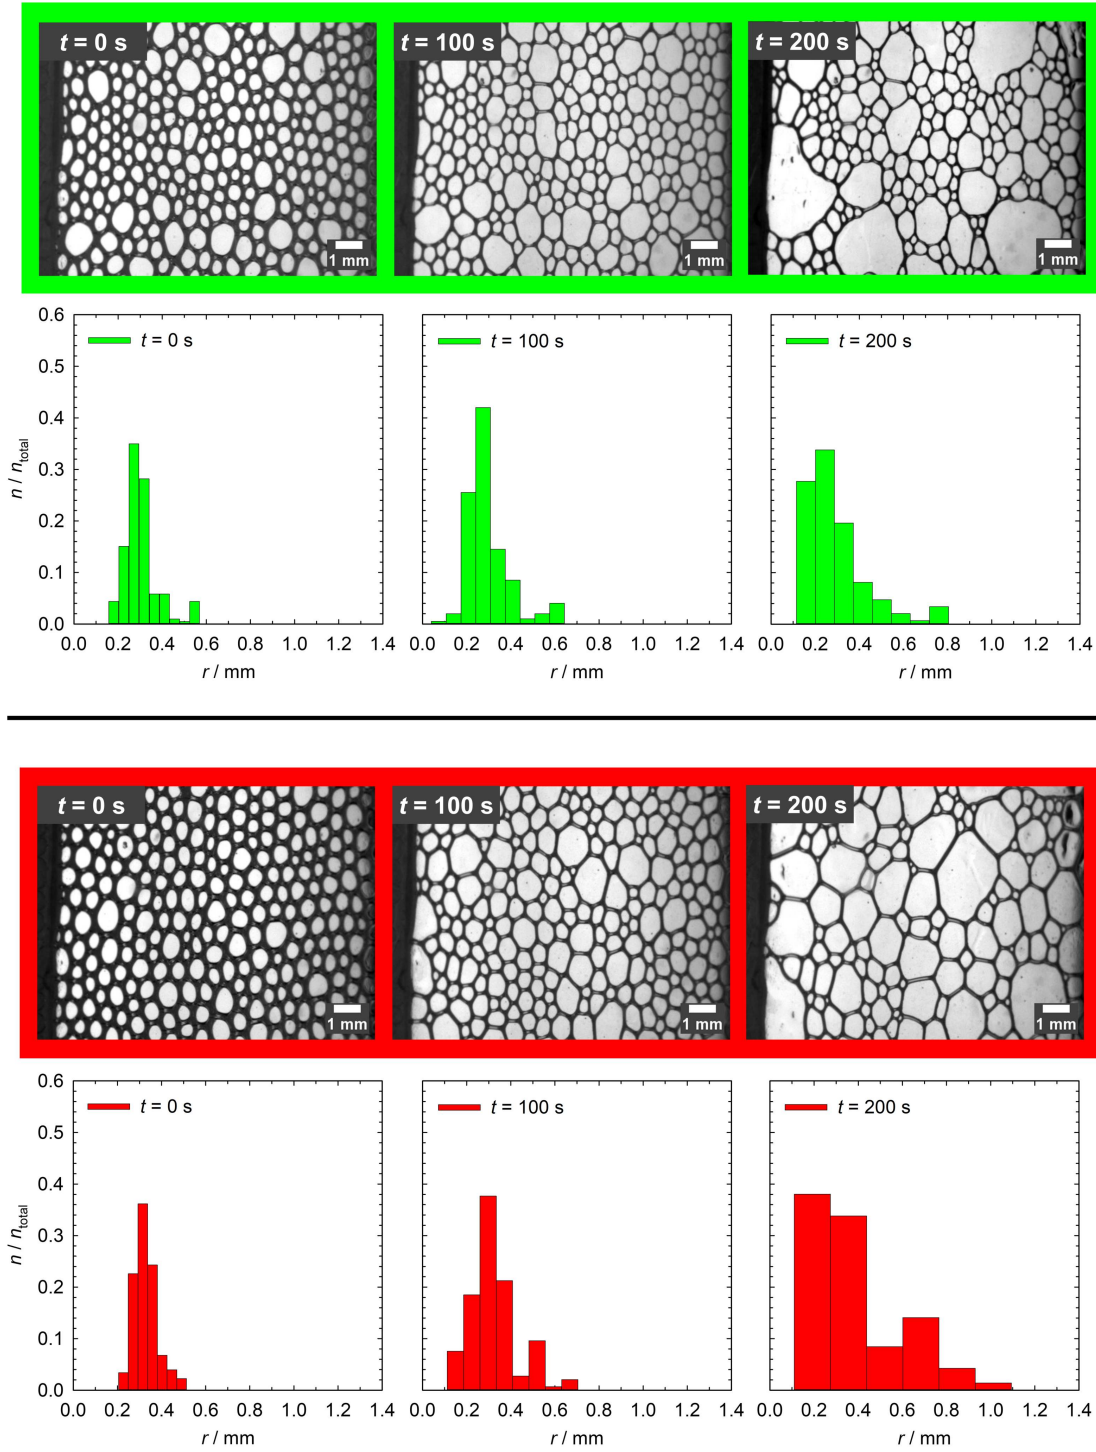

**Figure S5.6:** Cell size analysis pictures and bubble size distributions  $n/n_{\text{total}}$  plotted versus the bubble radius  $r$  for foams stabilized with aqueous 35 mM (10x CMC) C<sub>14</sub>TAB:TMBDA 1:5 solutions, i.e. the solutions contained 35 mM (10x CMC) surfactant and 175 mM TMBDA, foamed with N<sub>2</sub>. Photos were taken 0 s, 100 s, and 200 s after foam generation stopped. (top) the surfactant solution was pre-sparged with N<sub>2</sub> (Np, green). (bottom) the surfactant solution was pre-sparged with CO<sub>2</sub> (Cp, red).

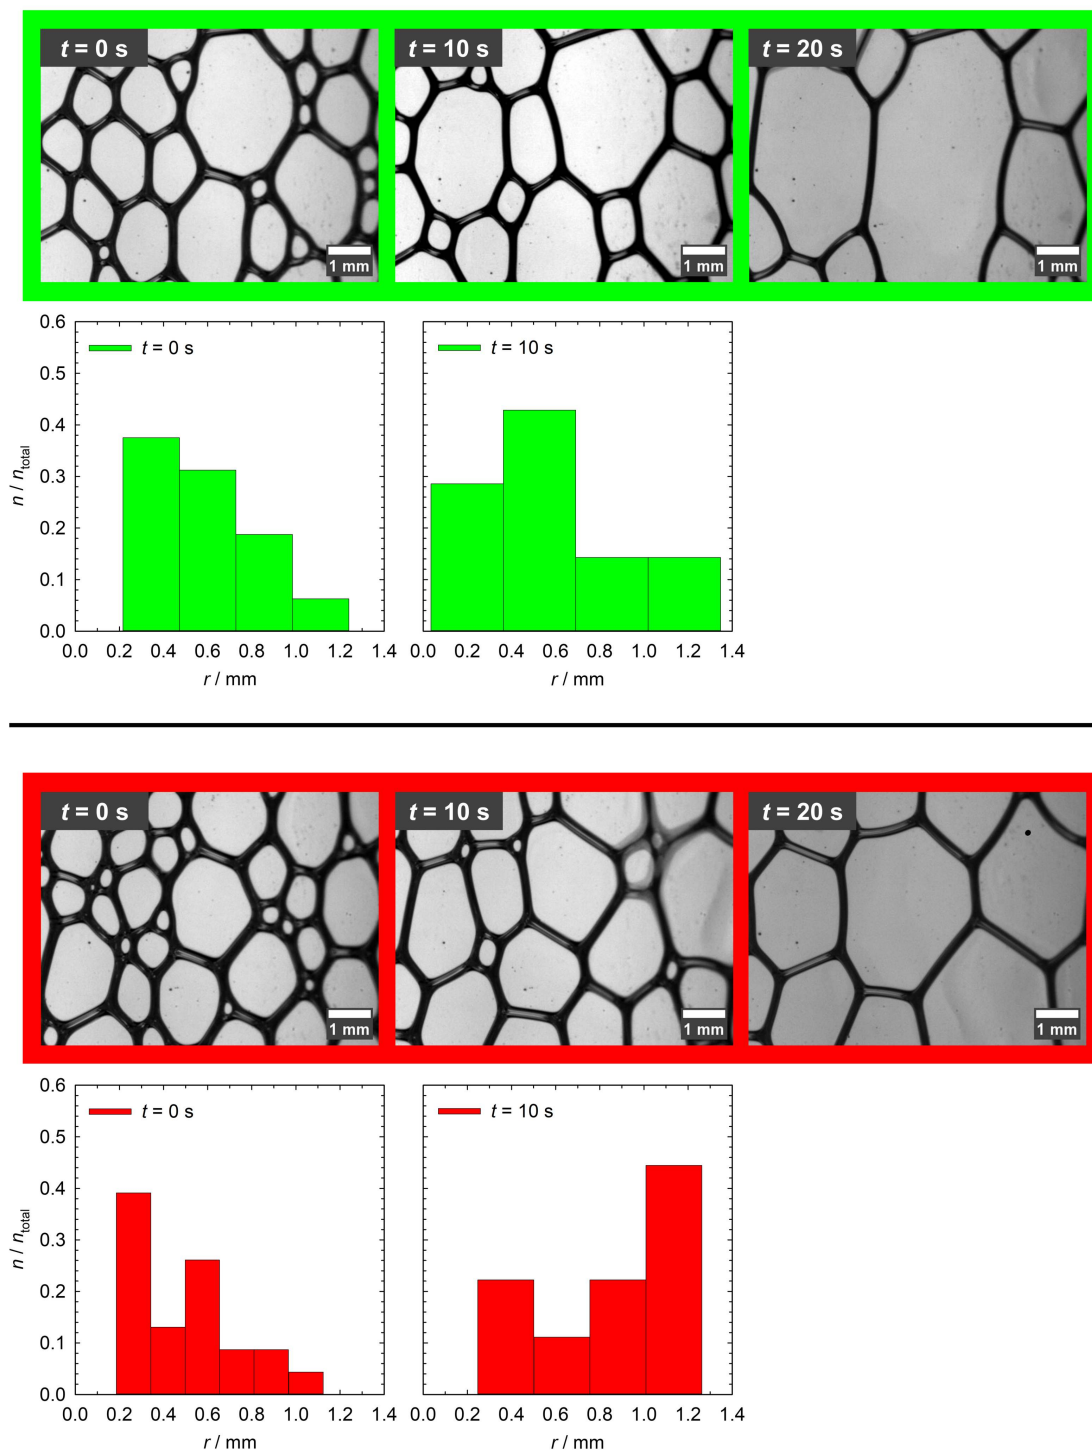

**Figure S5.7:** Cell size analysis pictures and bubble size distributions  $n/n_{\text{total}}$  plotted versus the bubble radius  $r$  for foams stabilized with aqueous 35 mM (10x CMC) C<sub>14</sub>TAB:TMBDA 1:5 solutions, i.e. the solutions contained 35 mM (10x CMC) surfactant and 175 mM TMBDA, foamed with CO<sub>2</sub>. Photos were taken 0 s, 10 s, and 20 s after foam generation stopped. (top) the surfactant solution was pre-sparged with N<sub>2</sub> (Np, green). (bottom) the surfactant solution was pre-sparged with CO<sub>2</sub> (Cp, red).

## References

- [1] C. Stubenrauch and K. Khristov, *Journal of Colloid and Interface Science*, 2005, **286**, 710–718.
- [2] J. H. Clint, *Journal of the Chemical Society, Faraday Transactions 1: Physical Chemistry in Condensed Phases*, 1975, **71**, 1327.
- [3] A. K. Alshamrani, J. R. Vanderveen and P. G. Jessop, *Physical chemistry chemical physics : PCCP*, 2016, **18**, 19276–19288.
- [4] P. G. Jessop and M. F. Cunningham, *CO<sub>2</sub>-switchable Materials: Solvents, Surfactants, Solutes and Solids*, 2021.
- [5] D. E. Leyden and J. M. McCall, *The Journal of Physical Chemistry*, 1971, **75**, 2400–2402.
- [6] V. B. Fainerman and E. H. Lucassen-Reynders, *Advances in Colloid and Interface Science*, 2002, **96**, 295–323.
- [7] V. B. Fainerman, R. Miller, E. V. Aksenenko and A. V. Makievski, *Surfactants: Chemistry, Interfacial Properties, Applications*, ed. V.B. Fainerman, D. Möbius, R. Miller, Elsevier, Amsterdam, 2002, Vol. 13, p 189-286.
- [8] V. B. Fainerman, S. V. Lylyk, E. V. Aksenenko, N. M. Kovalchuk, V. I. Kovalchuk, J. T. Petkov and R. Miller, *Journal of colloid and interface science*, 2012, **377**, 1–6.
